# Supplementary material for: Implantation of muscle satellite cells overexpressing myogenin improves denervated muscle atrophy in rats
Source: PubMed Central journal article supplement (PMC4742975; doi:10.1590/1414-431x20155124), 2016-02-05
Supplement: 1414-431X-bjmbr-1414-431X20155124-S1.pdf [file 1414-431X-bjmbr-1414-431X20155124-S1.pdf]

**Table S1.** Wet muscle weight ratio (%).

|          | MTMs       | MSCs       | Control    | P                                                                |
|----------|------------|------------|------------|------------------------------------------------------------------|
| 2 weeks  | 67.17±6.79 | 58.83±5.31 | 53.00±7.67 | 0.04 <sup>+</sup><br>0.007 <sup>#</sup><br>0.16 <sup>&amp;</sup> |
| 4 weeks  | 48.17±8.21 | 46.50±6.41 | 42.50±7.92 | 0.70 <sup>+</sup><br>0.25 <sup>#</sup><br>0.36 <sup>&amp;</sup>  |
| 24 weeks | 22.83±6.52 | 22.17±5.74 | 20.67±5.50 | 0.86 <sup>+</sup><br>0.55 <sup>#</sup><br>0.65 <sup>&amp;</sup>  |

Data are reported as means±SD. MTMs: MyoG-transfected MSCs; MSCs: muscle satellite cells. <sup>+</sup>MTMs vs MSCs; <sup>#</sup>MTMs vs vehicle control; <sup>&</sup>MSCs vs vehicle control (Student's *t*-test).

**Table S2.** Cross-sectional area of muscle fibers ( $\mu\text{m}^2$ ).

|         | MTMs              | MSCs              | Control           | P                                                                 |
|---------|-------------------|-------------------|-------------------|-------------------------------------------------------------------|
| 2 weeks | 2.63×103±0.39×103 | 1.99×103±0.58×103 | 1.57×103±0.47×103 | 0.049 <sup>+</sup><br>0.002 <sup>#</sup><br>0.21 <sup>&amp;</sup> |

MTMs: MyoG-transfected MSCs; MSCs: muscle satellite cells. <sup>+</sup>MTMs vs MSCs; <sup>#</sup>MTMs vs vehicle control; <sup>&</sup>MSCs vs vehicle control (Student's *t*-test).

**Table S3.** Expression levels of MyoG normalized to GAPDH levels ( $2^{-\Delta\Delta\text{CT}}$ ).

|          | MTMs      | MSCs      | Control   | P                                                               |
|----------|-----------|-----------|-----------|-----------------------------------------------------------------|
| 2 weeks  | 3.18±1.13 | 1.41±0.65 | 1.03±0.19 | 0.04 <sup>+</sup><br>0.01 <sup>#</sup><br>0.31 <sup>&amp;</sup> |
| 4 weeks  | 0.44±0.08 | 0.44±0.22 | 0.27±0.09 | 0.98 <sup>+</sup><br>0.03 <sup>#</sup><br>0.21 <sup>&amp;</sup> |
| 24 weeks | 0.23±0.10 | 0.22±0.11 | 0.24±0.08 | 0.90 <sup>+</sup><br>0.89 <sup>#</sup><br>0.79 <sup>&amp;</sup> |

MTMs: MyoG-transfected MSCs; MSCs: muscle satellite cells. <sup>+</sup>MTMs vs MSCs; <sup>#</sup>MTMs vs vehicle control; <sup>&</sup>MSCs vs vehicle control (Student's *t*-test).
